# Supplementary material
Source: Springer Nature journal article supplement (https://www.springermedizin.de/resource/supplementary/12889_2009_2062_MOESM5_ESM.pdf/9484474)

|                            | Beta  | 95% CI        |
|----------------------------|-------|---------------|
| <b>CHC</b>                 |       |               |
| Chronic Disease Management | -10.6 | (-21.5, 0.3)  |
| Diabetes                   | -4.7  | (-18.2, 8.8)  |
| Coronary Artery Disease    | -6.4  | (-25.9, 13.2) |
| <b>FFS</b>                 |       |               |
| Chronic Disease Management | -11.2 | (-21.7, -0.8) |
| Diabetes                   | -8.3  | (-21.2, 4.6)  |
| Coronary Artery Disease    | -8.4  | (-23.3, 6.5)  |
| <b>FHN</b>                 |       |               |
| Chronic Disease Management | -4.2  | (-13.7, 5.3)  |
| Diabetes                   | -2.1  | (-21.2, 4.6)  |
| Coronary Artery Disease    | -1.2  | (-16, 13.5)   |
| <b>HSO</b>                 |       |               |
| Chronic Disease Management | -2.1  | (-11.3, 7.1)  |
| Diabetes                   | -2.4  | (-14.4, 9.7)  |
| Coronary Artery Disease    | -1.3  | (-14.5, 11.8) |

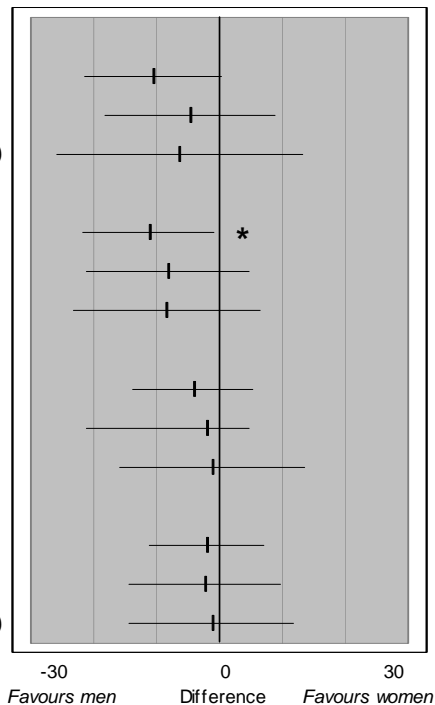

Supplement: MOESM5 [file 9484474]
